# Supplementary material for: Genomic and phylogenetic evidence of VIPER retrotransposon domestication in trypanosomatids
Source: PubMed Central journal article supplement (PMC5146736; doi:10.1590/0074-02760160224), 2016-11-16
Supplement: 0074-0276-mioc-0074-02760160224-suppl01.pdf [file 0074-0276-mioc-0074-02760160224-suppl01.pdf]

TABLE

TryTripDB gene identification (ID) of the orthologous genes located up and downstream the domesticated gene. The upstream gene is annotated for some species as “Zn-finger in Ran binding protein and others” and the downstream gene is annotated as “hypothetical protein, conserved”. Species that contain the domesticated gene are shown in bold. The IDs of orthologous genes from species where the domesticated gene was not found were also provided

| Organism                                               | Upstream gene                    | Downstream gene       |
|--------------------------------------------------------|----------------------------------|-----------------------|
| <b><i>Crithidia fasciculata</i> strain Cf-C1</b>       | CfaC1_21: 1262421- 1263227*      | CFAC1_210044900       |
| <i>Endotrypanum monterogei</i> strain LV88             | EmoLV88_33: 1359639- 1360553*    | EMOLV88_330037700     |
| <b><i>Leishmania panamensis</i> L13</b>                | LPAL13_330041700                 | LPAL13_330041900      |
| <i>Leishmania aethiopica</i> L147                      | LAEL147_000701800                | LAEL147_000701900     |
| <i>Leishmania arabica</i> strain LEM1108               | LarLEM1108_33: 1307955- 1308869* | LARLEM1108_330039800  |
| <b><i>Leishmania braziliensis</i> MHOM/BR/75/M2903</b> | LBRM2903_330043500               | LBRM2903_330043700    |
| <b><i>Leishmania braziliensis</i> MHOM/BR/75/M2904</b> | LbrM.33: 1456663-1457580*        | LbrM.33.3500          |
| <i>Leishmania donovani</i> BPK282A1                    | Ld33_v01s1: 1435155-1436069      | LdBPK_333370.1        |
| <i>Leishmania enriettii</i> strain LEM3045             | LENLEM3045_330042100             | LENLEM3045_330042200  |
| <i>Leishmania gerbilli</i> strain LEM452               | LGELEM452_330042900              | LGELEM452_330043000   |
| <i>Leishmania infantum</i> JPCM5                       | LinJ.33: 1429595-1430509*        | LinJ.33.3370          |
| <i>Leishmania major</i> strain LV39c5                  | LMJLV39_330045400                | LMJLV39_330045500     |
| <i>Leishmania major</i> strain SD 75.1                 | LMJSD75_330044200                | LMJSD75_330044300     |
| <i>Leishmania mexicana</i> MHOM/GT/2001/U1103          | LmxM.32: 1390571-1391485*        | LmxM.32.3220          |
| <b><i>Leishmania</i> sp. MAR LEM2494</b>               | LMARLEM2494_330040600            | LMARLEM2494_330040800 |
| <i>Leishmania tarentolae</i> Parrot-TarI               | LtaP33.3470                      | LtaP33.3480           |
| <i>Leishmania tropica</i> L590                         | LTRL590_330041700                | LTRL590_330041800     |
| <i>Leishmania turanica</i> strain LEM423               | LTULEM423_330043000              | LTULEM423_330043100   |
| <b><i>Leptomonas pyrrocoris</i> H10</b>                | LpyrH10_03_5680                  | LpyrH10_03_5700       |
| <i>Leptomonas seymouri</i> ATCC 30220                  | Lsey_0124_0160                   | Lsey_0124_0180        |
| <i>Trypanosoma brucei</i> Lister strain 427            | Tb427.02.6070                    | Tb427.02.6080         |
| <i>Trypanosoma brucei</i> TREU927                      | Tb927.2.6070                     | Tb927.2.6080          |
| <i>Trypanosoma brucei</i> gambiense DAL972             | Tbg.972.2.4240                   | Tbg.972.2.4250        |
| <i>Trypanosoma congolense</i> IL3000                   | TcIL3000_2_1690                  | TcIL3000_2_1700       |
| <i>Trypanosoma cruzi</i> CL Brener Esmeraldo-like      | TcCLB.507105.20                  | TcCLB.507105.30       |
| <i>Trypanosoma cruzi</i> CL Brener Non-Esmeraldo-like  | TcCLB.506815.40                  | TcCLB.506815.50       |
| <i>Trypanosoma cruzi</i> Dm28c                         | TCDM_07380                       | TCDM_07379            |
| <i>Trypanosoma cruzi</i> Sylvio X10/1                  | TCSYLVIO_004016                  | TCSYLVIO_004017       |
| <i>Trypanosoma cruzi</i> marinkellei strain B7         | Tc_MARK_2783                     | Tc_MARK_2784          |
| <i>Trypanosoma evansi</i> strain STIB 805              | TevSTIB805.2.3440                | TevSTIB805.2.3450     |
| <i>Trypanosoma grayi</i> ANR4                          | Tgr.572.1040                     | Tgr.572.1050          |
| <i>Trypanosoma rangeli</i> SC58 <sup>1</sup>           | TRSC58_00071                     | Not found             |
| <i>Trypanosoma vivax</i> Y486                          | TvY486_0202070                   | TvY486_0202080        |

\*: non annotated orthologues. The chromosomal position of the open reading frame is indicated; <sup>1</sup>: the downstream gene was not found for this species and the upstream gene is located in a small contig.

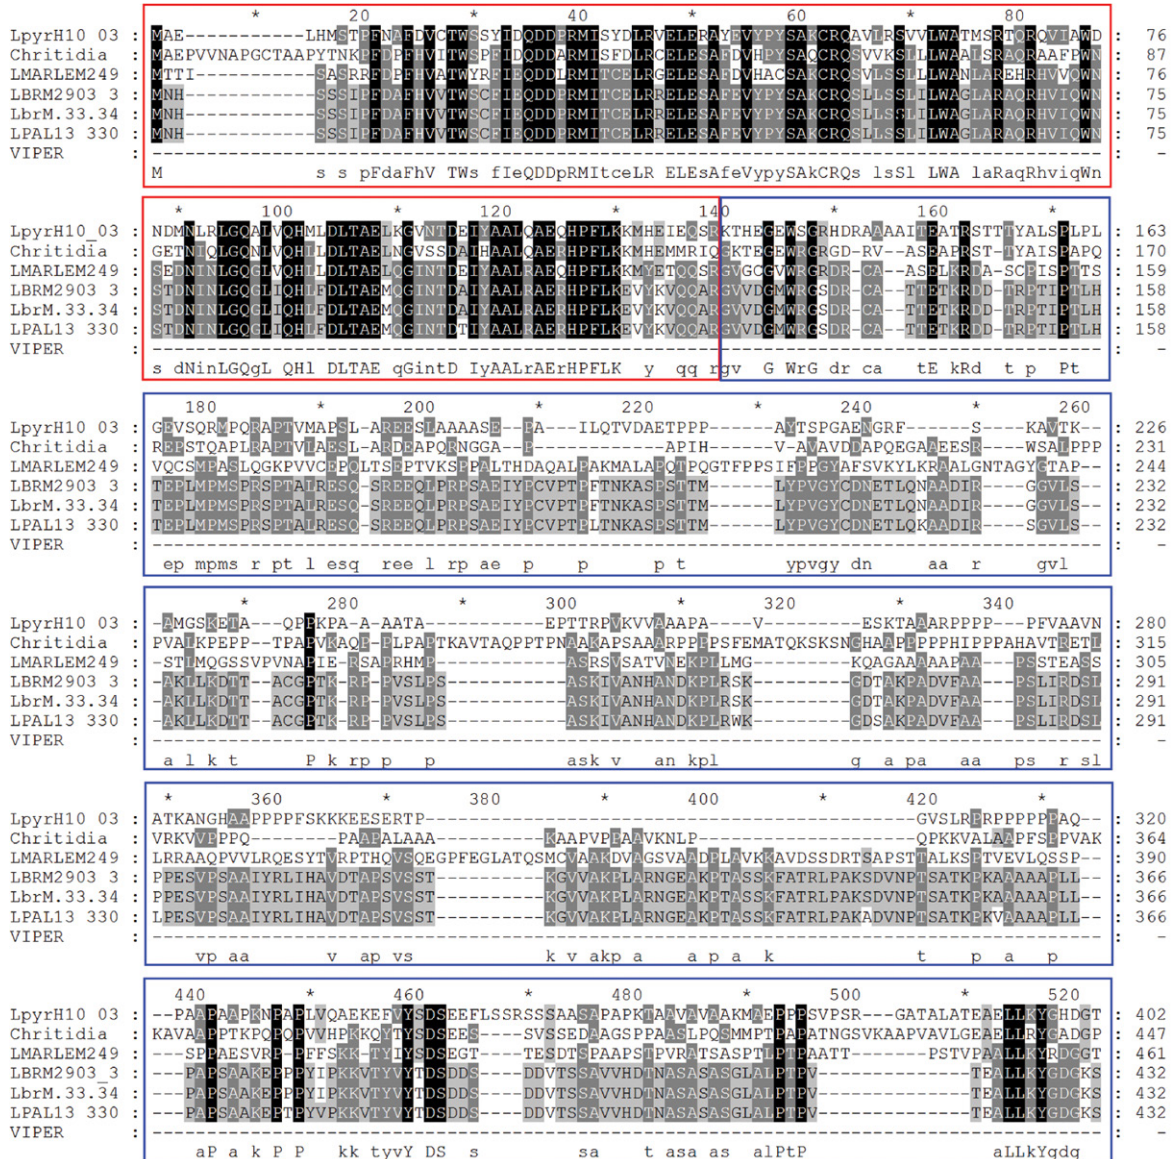

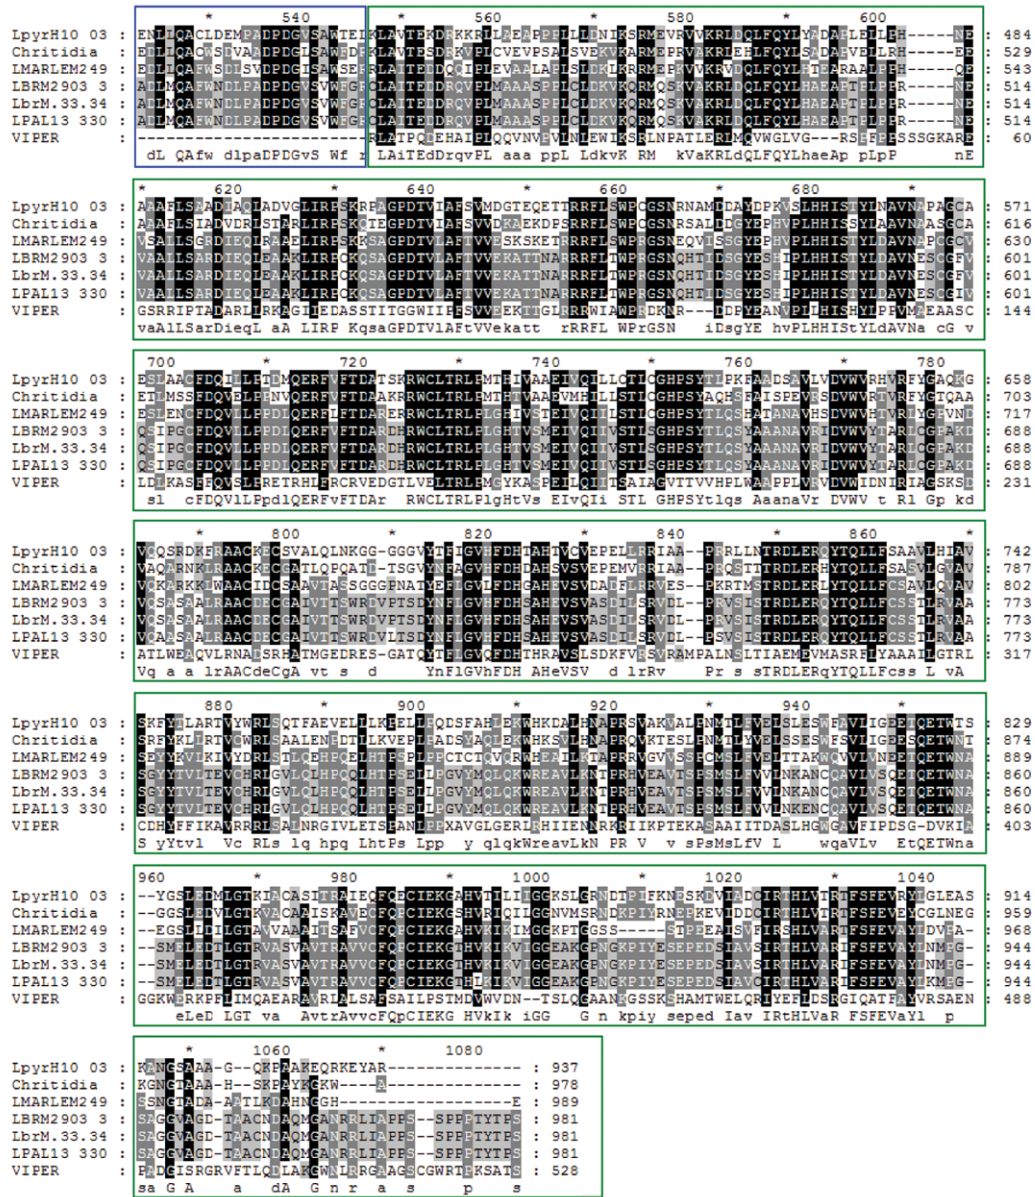

Alignment view of amino acid sequences of the domesticated gene from different species and the C-terminal portion of the third VIPER protein. The distinct regions I, II, and III of the protein are represented by red, blue, and green boxes, respectively. The order of genes from top to bottom is LpyrH10\_03\_5690, *Critidia* non-annotated gene, LMARLEM249\_330040700, LBRM2903\_330043600, LbrM.33.3490, LPAL13\_330041800, and VIPER.
